# Supplementary material for: Two independent methods for mapping the grounding line of an outlet glacier – an example from the Astrolabe Glacier, Terre Adélie, Antarctica
Source: Copernicus journal article supplement (doi:10.5194/tc-8-1331-2014), 2014-07-24
Supplement: Supplementary file 3 [file tc-8-1331-2014-supplement.zip]

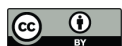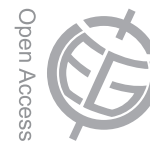

## *Supplement of*

# **Two independent methods for mapping the grounding line of an outlet glacier – an example from the Astrolabe Glacier, Terre Adélie, Antarctica**

**E. Le Meur et al.**

*Correspondence to:* E. Le Meur ([lemeur@lgge.obs.ujf-grenoble.fr](mailto:lemeur@lgge.obs.ujf-grenoble.fr))

- Supplement-Cover-Letter.pdf
- single-col-b&w.pdf
- single-col-color.pdf
- two-col-b&w.pdf
