# Supplementary material for: Two independent methods for mapping the grounding line of an outlet glacier – an example from the Astrolabe Glacier, Terre Adélie, Antarctica
Source: Copernicus journal article supplement (doi:10.5194/tc-8-1331-2014), 2014-07-24
Supplement: Supplementary file 5 [file tc-8-1331-2014-supplement.zip]

Archive with 4 entries (4 files):
- supplement-cover-letter.pdf
- two-col-b&w.pdf
- single-col-b&w.pdf
- single-col-color.pdf
